# Supplementary material for: Dielectric investigation of high-k yttrium copper titanate thin films
Source: Royal Society of Chemistry journal article supplement (doi:10.1039/c5tc03189c), 2015-12-24
Supplement: c5tc03189c1.pdf [file c5tc03189c1.pdf]

## Supplementary Information

### **Dielectric investigation on high-k Yttrium Copper Titanate thin films**

Anna Grazia Monteduro<sup>a, b</sup>, Zoobia Ameer<sup>a, b</sup>, Maurizio Martino<sup>a</sup>, Anna Paola Caricato<sup>a</sup>, Vittorianna Tasco<sup>b</sup>, Indira Chaitanya Lekshmi<sup>c, †</sup>, Ross Rinaldi<sup>a, c</sup>, Abhijit Hazarika<sup>d</sup>, Debraj Choudhury<sup>d, e</sup>, D. D. Sarma<sup>d, f, \*</sup>, Giuseppe Maruccio<sup>a, b, \*</sup>

<sup>a</sup>*Department Of Mathematics and Physics, University Of Salento, Via per Arnesano, 73100, Lecce, Italy*

<sup>b</sup>*CNR NANOTEC - Istituto di Nanotecnologia, Via per Arnesano, 73100 Lecce, Italy*

<sup>c</sup>*CNR NANO - Istituto Nanoscienze, Via per Arnesano, 73100 Lecce, Italy*

<sup>d</sup>*Solid State and Structural Chemistry Unit, Indian Institute of Science, Bangalore, 560012, India.*

<sup>e</sup>*Department of Physics, Indian Institute of Technology Kharagpur, Kharagpur 721302, India*

<sup>f</sup>*Council of Scientific and Industrial Research - Network of Institutes for Solar Energy (CSIR-NISE), New Delhi, India*

<sup>†</sup>Present address: Dept of Chemistry, CMR Institute of Technology, 132, AECS layout, IT Park Road, Bangalore 560037.

\*corresponding authors: [giuseppe.maruccio@unisalento.it](mailto:giuseppe.maruccio@unisalento.it), [sarma@sscu.iisc.ernet.in](mailto:sarma@sscu.iisc.ernet.in)

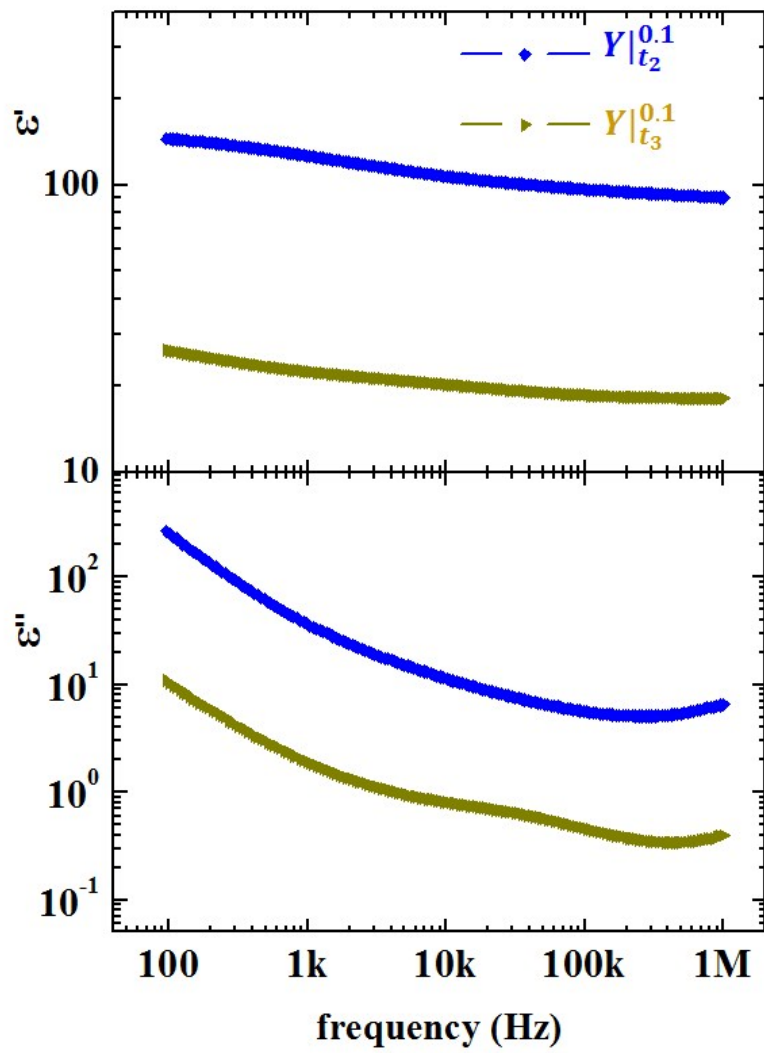

Fig. S1 Frequency dependences of real ( $\epsilon'$ ) and imaginary part ( $\epsilon''$ ) of the complex permittivity in the frequency range 100Hz-1MHz for two YCTO films deposited at 0.1 Pa oxygen pressure with thickness  $t_2=150\text{nm}$  and  $t_3=50\text{nm}$ .

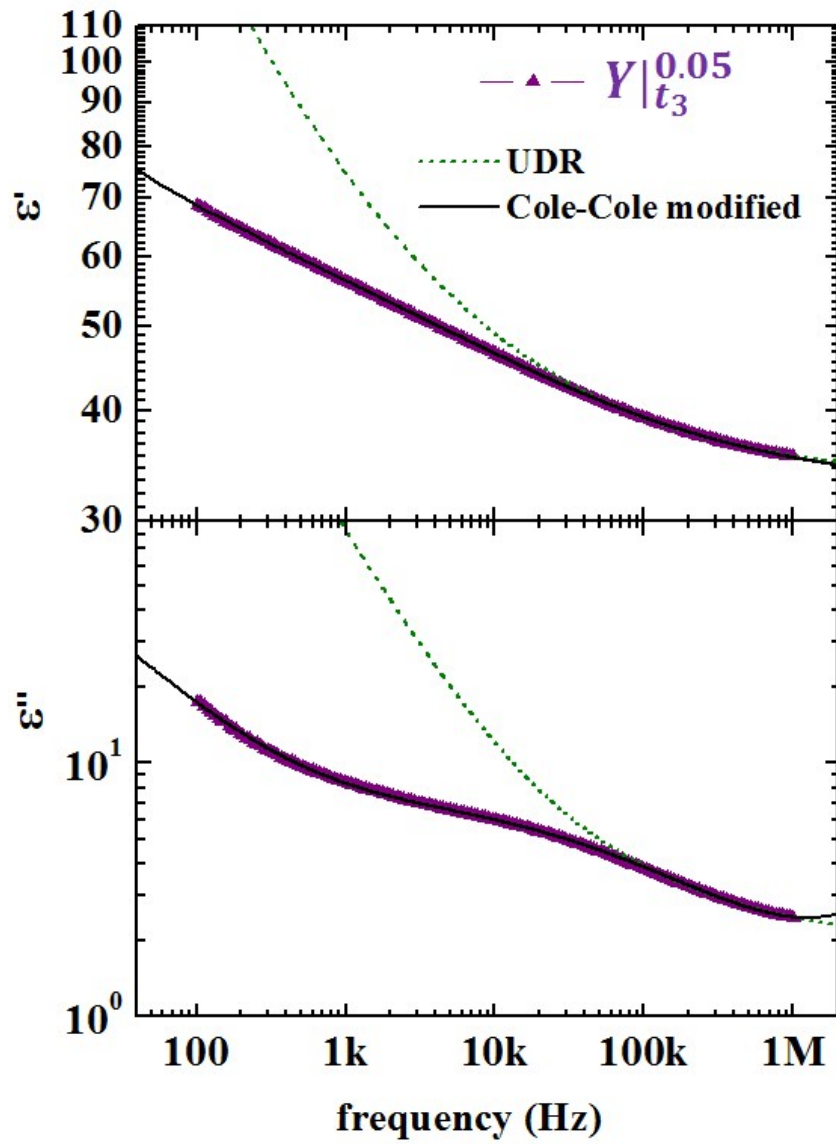

Fig. S2.  $Y|_{t_3}^{0.05}$  film modeled by using the UDR and modified Cole-Cole models. The UDR model is able to describe only the high frequency behaviour of the complex permittivity, while the modified Cole-Cole model fits the data over the whole frequency range.
